**ERRATUM**

In the Table of Contents in the February 1999 issue of ANESTHESIOLOGY (1999; 90:25A) the last sentence of the precis of the article authored by Kayser *et al.* was incorrectly linked with the Special Article Practice Guidelines authored by The Task Force on Obstetrical Anesthesia. We regret the error.

**AUTHOR CORRECTION**

A Clinical Investigation authored by Naguib *et al.* published in the November 1998 issue of ANESTHESIOLOGY (1998; 89:1116-24) contained an error. The first sentence in the Results in the Abstract should read as follows:

The calculated ED<sub>50</sub> values and their 95% confidence intervals were 111 (107-115) and 26.2 (25.8-26.5)  $\mu$ g/kg for rocuronium and cisatracurium, respectively. The authors regret this error.

**AUTHOR CORRECTION**

For the article by Palmer *et al.* in the February 1999 issue of ANESTHESIOLOGY (1999; 90:437-44) the authors would like to make the following correction:

In the Conclusions section in the Abstract, the second sentence should read, "For optimal analgesia, augmentation of intrathecal morphine with systemic opioids may be necessary."
